# Supplementary material
Source: Springer Nature journal article supplement (https://www.springermedizin.de/resource/supplementary/13048_2013_204_MOESM4_ESM.pdf/9665128)

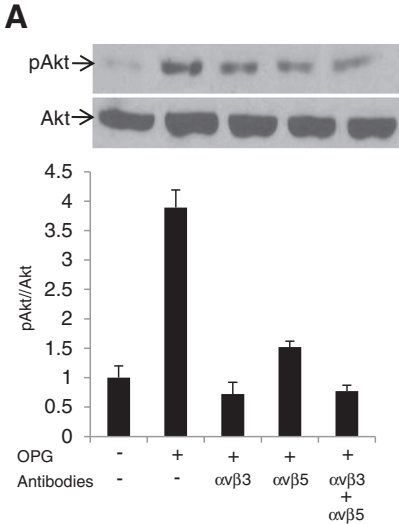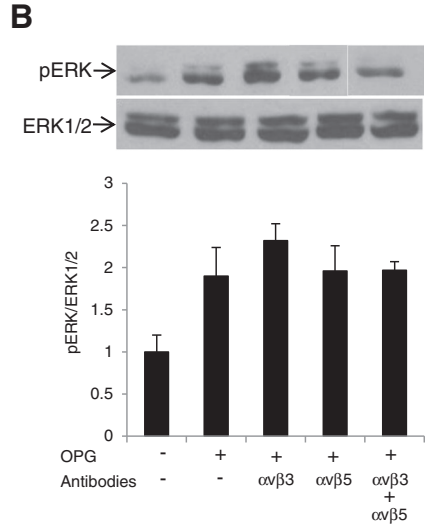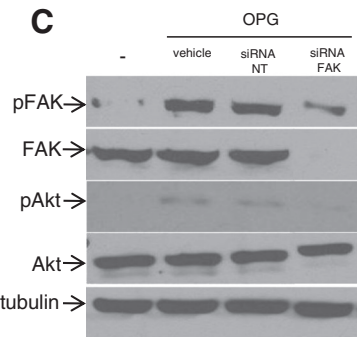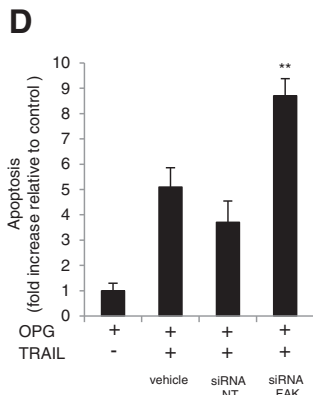

Supplement: MOESM4 [file 9665128]
